# Supplementary material
Source: MDPI journal article supplement (https://www.mdpi.com/2073-4433/14/3/470)
Supplement: s1 [file s1]

# Supplementary Materials: Aerosols as Vectors for Contaminants: A Perspective Based on Outdoor Aerosol Data from Kuwait

Saif Uddin <sup>1,\*</sup>, Nazima Habibi <sup>1</sup>, Scott W. Fowler <sup>2,†</sup>, Montaha Behbehani <sup>1</sup>, Bondi Gevaio <sup>3</sup>, Mohammad Faizuddin <sup>4</sup> and Aysun Ugur Gorgun <sup>5</sup>

<sup>1</sup> Environment and Life Sciences Research Center, Kuwait Institute for Scientific Research, Safat 13109, Kuwait

<sup>2</sup> School of Marine and Atmospheric Sciences, Stony Brook University, Stony Brook, NY 11794-5000, USA

<sup>3</sup> Environment Protection Agency, Freetown, Sierra Leone

<sup>4</sup> Gulf Geoinformation Solutions, Sharjah P.O. Box 49590, United Arab Emirates

<sup>5</sup> Institute of Nuclear Sciences, Ege University, Izmir 35040, Türkiye

\* Correspondence: [sdin@kisir.edu.kw](mailto:sdin@kisir.edu.kw)

† Present address: Institute Bobby, 8 Allée des Orangers, 06320 Cap d'Ail, France

**Table S1.** Polonium-210 activity concentration (Bq kg<sup>-1</sup> dry weight  $\pm 1\sigma$ ) in size fractioned aerosol samples collected from Remote and Urban sites in Kuwait.

| Sampling date<br>m/d/a | Remote Site          |                      |                        | Urban Site           |                      |                        |
|------------------------|----------------------|----------------------|------------------------|----------------------|----------------------|------------------------|
|                        | PM <sub>&gt;10</sub> | PM <sub>2.5-10</sub> | PM <sub>0.39-2.5</sub> | PM <sub>&gt;10</sub> | PM <sub>2.5-10</sub> | PM <sub>0.39-2.5</sub> |
| 2/3/2019               | 1994 $\pm$ 111       | 2310 $\pm$ 157       | 2086 $\pm$ 103         | 2438 $\pm$ 122       | 2375 $\pm$ 165       | 2537 $\pm$ 144         |
| 3/3/2019               | 2315 $\pm$ 109       | 2305 $\pm$ 124       | 2333 $\pm$ 127         | 2352 $\pm$ 109       | 2559 $\pm$ 122       | 2344 $\pm$ 108         |
| 4/7/2019               | 2479 $\pm$ 138       | 2218 $\pm$ 102       | 2285 $\pm$ 119         | 2353 $\pm$ 121       | 2353 $\pm$ 125       | 2375 $\pm$ 129         |
| 5/5/2019               | 1501 $\pm$ 62        | 2541 $\pm$ 152       | 2314 $\pm$ 112         | 1989 $\pm$ 99        | 2537 $\pm$ 114       | 2399 $\pm$ 115         |
| 6/2/2019               | 2812 $\pm$ 139       | 2514 $\pm$ 127       | 2482 $\pm$ 140         | 2232 $\pm$ 122       | 2563 $\pm$ 147       | 2459 $\pm$ 137         |
| 7/7/2019               | 3161 $\pm$ 170       | 2722 $\pm$ 140       | 2451 $\pm$ 134         | 1942 $\pm$ 101       | 2566 $\pm$ 138       | 2554 $\pm$ 139         |
| 8/4/2019               | 2816 $\pm$ 166       | 2359 $\pm$ 123       | 2227 $\pm$ 128         | 2429 $\pm$ 129       | 2286 $\pm$ 125       | 2575 $\pm$ 134         |
| 9/1/2019               | 2458 $\pm$ 140       | 2393 $\pm$ 124       | 2226 $\pm$ 117         | 2299 $\pm$ 118       | 2327 $\pm$ 119       | 2512 $\pm$ 128         |
| 10/6/2019              | 2397 $\pm$ 128       | 2727 $\pm$ 147       | 2165 $\pm$ 109         | 2707 $\pm$ 130       | 2643 $\pm$ 148       | 2556 $\pm$ 142         |
| 11/3/2019              | 2539 $\pm$ 149       | 2469 $\pm$ 142       | 2421 $\pm$ 139         | 2037 $\pm$ 108       | 2829 $\pm$ 161       | 2599 $\pm$ 140         |
| 12/1/2019              | 2913 $\pm$ 156       | 2572 $\pm$ 131       | 2407 $\pm$ 113         | 2233 $\pm$ 127       | 2479 $\pm$ 150       | 2196 $\pm$ 112         |
| 1/5/2020               | 2492 $\pm$ 134       | 2886 $\pm$ 155       | 2410 $\pm$ 128         | 2158 $\pm$ 122       | 2909 $\pm$ 158       | 2356 $\pm$ 133         |
| 1/19/2020              | 2431 $\pm$ 112       | 2447 $\pm$ 123       | 2439 $\pm$ 142         | 2613 $\pm$ 149       | 2775 $\pm$ 144       | 2437 $\pm$ 116         |
| 2/2/2020               | 2402 $\pm$ 126       | 2722 $\pm$ 115       | 2358 $\pm$ 111         | 2257 $\pm$ 120       | 2936 $\pm$ 145       | 2786 $\pm$ 112         |
| <b>Mean</b>            | <b>2482</b>          | <b>2513</b>          | <b>2329</b>            | <b>2289</b>          | <b>2581</b>          | <b>2477</b>            |

**Table S2.** Lead-210 activity concentration (Bq kg<sup>-1</sup> dry weight  $\pm 1\sigma$ ) in size fractioned aerosol samples collected from Remote and Urban sites in Kuwait.

| Sampling date<br>m/d/a | Remote Site          |                      |                        | Urban Site           |                      |                        |
|------------------------|----------------------|----------------------|------------------------|----------------------|----------------------|------------------------|
|                        | PM <sub>&gt;10</sub> | PM <sub>2.5-10</sub> | PM <sub>0.39-2.5</sub> | PM <sub>&gt;10</sub> | PM <sub>2.5-10</sub> | PM <sub>0.39-2.5</sub> |
| 2/3/2019               | 563 $\pm$ 21         | 617 $\pm$ 19         | 615 $\pm$ 19           | 849 $\pm$ 21         | 743 $\pm$ 22         | 753 $\pm$ 24           |
| 3/3/2019               | 674 $\pm$ 20         | 732 $\pm$ 23         | 709 $\pm$ 23           | 823 $\pm$ 21         | 860 $\pm$ 22         | 744 $\pm$ 26           |
| 4/7/2019               | 735 $\pm$ 27         | 721 $\pm$ 20         | 663 $\pm$ 24           | 730 $\pm$ 20         | 735 $\pm$ 21         | 685 $\pm$ 17           |
| 5/5/2019               | 464 $\pm$ 19         | 733 $\pm$ 21         | 676 $\pm$ 20           | 585 $\pm$ 16         | 772 $\pm$ 25         | 756 $\pm$ 23           |
| 6/2/2019               | 1013 $\pm$ 28        | 816 $\pm$ 21         | 717 $\pm$ 22           | 692 $\pm$ 19         | 801 $\pm$ 19         | 733 $\pm$ 23           |
| 7/7/2019               | 1045 $\pm$ 32        | 861 $\pm$ 23         | 714 $\pm$ 18           | 607 $\pm$ 18         | 830 $\pm$ 23         | 777 $\pm$ 22           |
| 8/4/2019               | 895 $\pm$ 25         | 775 $\pm$ 21         | 640 $\pm$ 20           | 770 $\pm$ 22         | 684 $\pm$ 22         | 774 $\pm$ 23           |
| 9/1/2019               | 654 $\pm$ 20         | 706 $\pm$ 22         | 730 $\pm$ 23           | 759 $\pm$ 21         | 693 $\pm$ 15         | 791 $\pm$ 29           |

|             |            |            |            |            |            |            |
|-------------|------------|------------|------------|------------|------------|------------|
| 10/6/2019   | 879±23     | 856±21     | 652±19     | 841±23     | 823±22     | 782±21     |
| 11/3/2019   | 780±22     | 749±22     | 836±22     | 635±22     | 812±19     | 807±27     |
| 12/1/2019   | 993±26     | 840±16     | 777±20     | 690±20     | 826±24     | 678±19     |
| 1/5/2020    | 689±20     | 985±27     | 783±20     | 693±15     | 963±23     | 736±20     |
| 1/19/2020   | 740±22     | 807±23     | 764±23     | 792±22     | 824±20     | 783±19     |
| 2/2/2020    | 747±25     | 895±21     | 759±22     | 734±19     | 928±24     | 879±24     |
| <b>Mean</b> | <b>777</b> | <b>793</b> | <b>720</b> | <b>729</b> | <b>807</b> | <b>763</b> |

**Table S3.** Bacterial and Fungal load in outdoor aerosols.

| <i>Date</i> | <i>Size Cut off</i> | <i>Bacterial cells m<sup>-3</sup> of air</i> | <i>Fungal cells m<sup>-3</sup> of air</i> |
|-------------|---------------------|----------------------------------------------|-------------------------------------------|
| 15/02/2021  | < 0.22 µm           | 7.92E+05                                     | <LOD                                      |
|             | > 0.22 µm           | 6.05E+03                                     | <LOD                                      |
| 22/02/2021  | < 0.22 µm           | 1.21E+07                                     | <LOD                                      |
|             | > 0.22 µm           | 1.78E+05                                     | <LOD                                      |
| 12/04/2021  | < 0.22 µm           | 1.24E+08                                     | 2.66E+06                                  |
|             | > 0.22 µm           | 3.73E+04                                     | 6.53E+03                                  |
| 20/04/2021  | < 0.22 µm           | 1.05E+08                                     | 2.69E+06                                  |
|             | > 0.22 µm           | 8.42E+05                                     | 7.33E+03                                  |
| 27/04/2021  | < 0.22 µm           | 7.81E+06                                     | <LOD                                      |
|             | > 0.22 µm           | 2.08E+06                                     | 3.73E+02                                  |
| 04/05/2021  | < 0.22 µm           | 2.57E+07                                     | 8.40E+03                                  |
|             | > 0.22 µm           | 4.60E+05                                     | 3.99E+02                                  |
| 10/05/2021  | < 0.22 µm           | 1.82E+07                                     | 1.51E+04                                  |
|             | > 0.22 µm           | 1.53E+06                                     | 2.11E+02                                  |
| 20/05/2021  | < 0.22 µm           | 3.01E+07                                     | <LOD                                      |
|             | > 0.22 µm           | 6.17E+06                                     | <LOD                                      |
